# Supplementary material for: Long-Term Survival in Patients with Oligometastatic Non-Small Cell Lung Cancer by a Multimodality Treatment—Comparison with Stage III Disease
Source: MDPI journal article supplement (doi:10.3390/cancers16061174), 2024-03-17
Supplement: s1 [file s1]

Supplement Figures:

**Supplementary Materials: Figure 1 Supplement:** Flow chart, including of all patients receiving definitive and trimodality treatment, OMD Non-small cell lung cancer patients = OMDLC patients:  $N = 45 + 7 = 52$ .

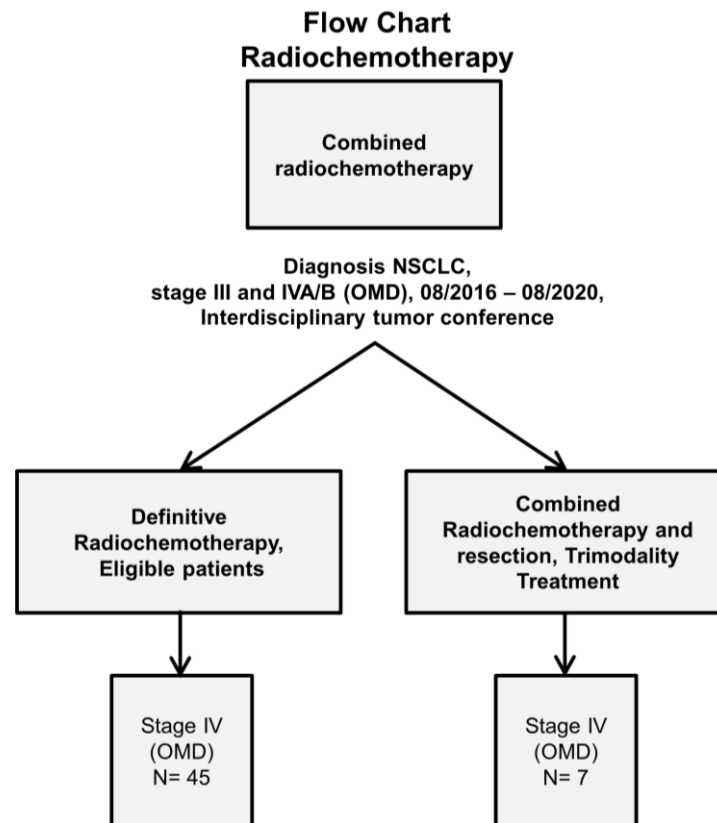

**Figure S1:** Flow chart, including of all patients receiving definitive and trimodality treatment, OMD Non-small cell lung cancer patients = OMDLC patients:  $N = 45 + 7 = 52$ .

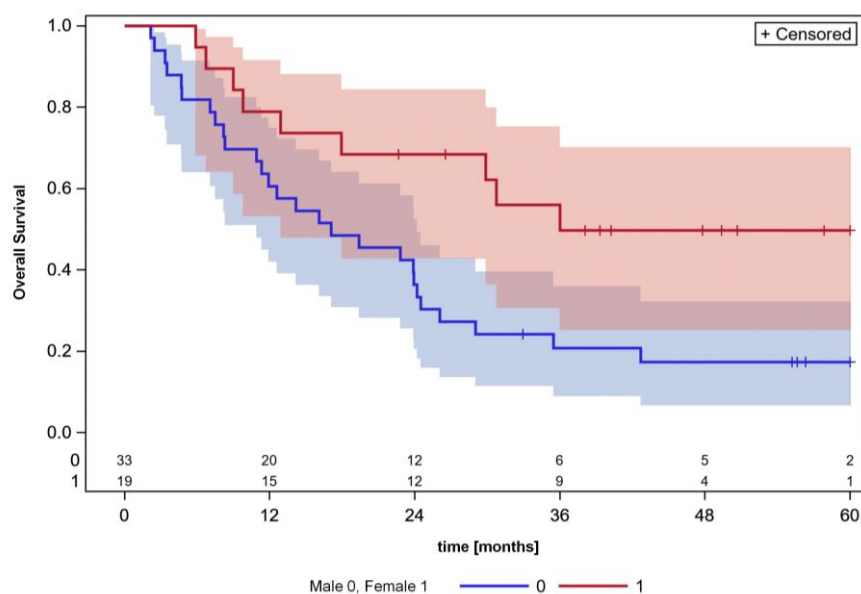

**Figure S2 (a):** Overall Survival in female [red line 1] and male patients [blue line 0].

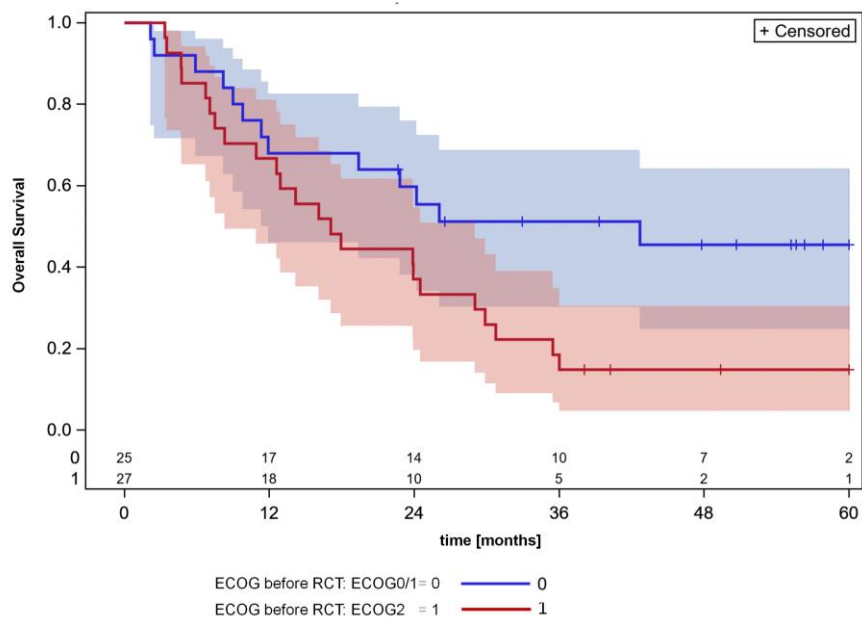

**Figure S2 (b):** Overall Survival dependent on ECOG performance status: ECOG 0/1 [blue line 0] and ECOG 2 [red line 1].

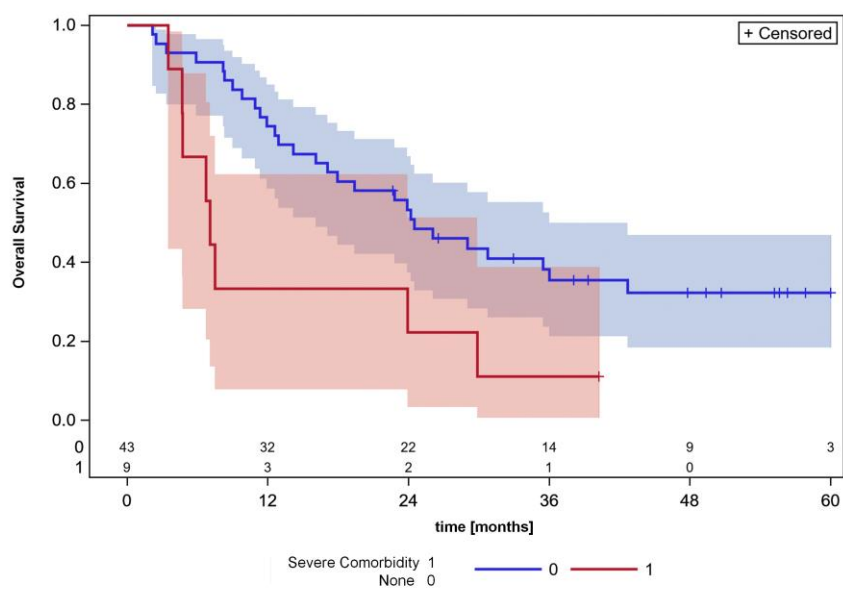

**Figure S2 (c):** Overall Survival dependent on presence of severe comorbidity: no higher comorbidities [blue line 0] and severe comorbidities [red line 1].
